# Supplementary material
Source: PubMed Central journal article supplement (PMC3228012)
Supplement: supp_the2010-0103_Supplementary_data.pdf [file supp_the2010-0103_Supplementary_data.pdf]

**Supplementary data**

**Table 1. MiRNAs with altered expression in malignancy**

| Tissue/tumor type                         | Increased expression                                                                         | Decreased expression                                      |
|-------------------------------------------|----------------------------------------------------------------------------------------------|-----------------------------------------------------------|
| Breast <sup>21, 22</sup>                  | miR-21, miR-29b-2                                                                            | miR-125b, miR-145 miR-10b, miR-155,<br>miR-17-5p, miR-27b |
| Ovarian <sup>23, 24</sup>                 | miR-141, miR-200(a-c), miR-221                                                               | let-7f, miR-140, miR-145, miR199a, miR-424                |
| Endometrial <sup>25-27</sup>              | miR-103, miR-107, miR-185, miR-205,<br>miR-210, miR-449                                      | miR-99b, miR-152, miR-193,<br>miR-204, miR-221, let-7i    |
| Glioblastoma <sup>28, 29</sup>            | miR-221, miR-21                                                                              | miR-181a, miR-181b, miR-181c                              |
| Chronic lymphocytic leukemia <sup>8</sup> |                                                                                              | miR-15, miR-16                                            |
| Lymphoma <sup>28, 30</sup>                | miR-155, miR-17-92cluster                                                                    | miR-15a                                                   |
| Colorectal <sup>9, 28-31</sup>            | miR-10a, miR-17-92 cluster, miR-20a,<br>miR-24-1, miR-29b-2, miR-31                          | miR-143, miR-145, let-7                                   |
| Thyroid <sup>28, 29</sup>                 | miR-221, miR-222, miR-146, miR-181b,<br>miR-197, miR-346                                     |                                                           |
| Hepatocellular <sup>28, 29</sup>          | miR-18, miR-224                                                                              | miR-199a, miR-195, miR-200a, miR-125a                     |
| Testicular <sup>30</sup>                  | miR-372, miR-373                                                                             |                                                           |
| Pancreatic <sup>28-30</sup>               | miR-221, miR-376a, miR301, miR-21,<br>miR-24-2, miR-100, miR-103-1,2,<br>miR-107, miR-125b-1 | miR-375                                                   |
| Cholangiocarcinoma <sup>29</sup>          | miR-21, miR-141, miR-200b                                                                    |                                                           |
| Prostate <sup>30, 32-34</sup>             | let-7d, miR-195, miR-203                                                                     | miR-128a                                                  |
| Gastric <sup>28-30</sup>                  | miR-223, miR-21, miR-103-2                                                                   | miR-218-2                                                 |
| Lung <sup>13, 28-30</sup>                 | mir-17-92 cluster, miR-17-5p                                                                 | let-7 family                                              |

# Supplementary Data Figure 1.

## miR-16 expression

(226 samples: breast cancer cases and controls)

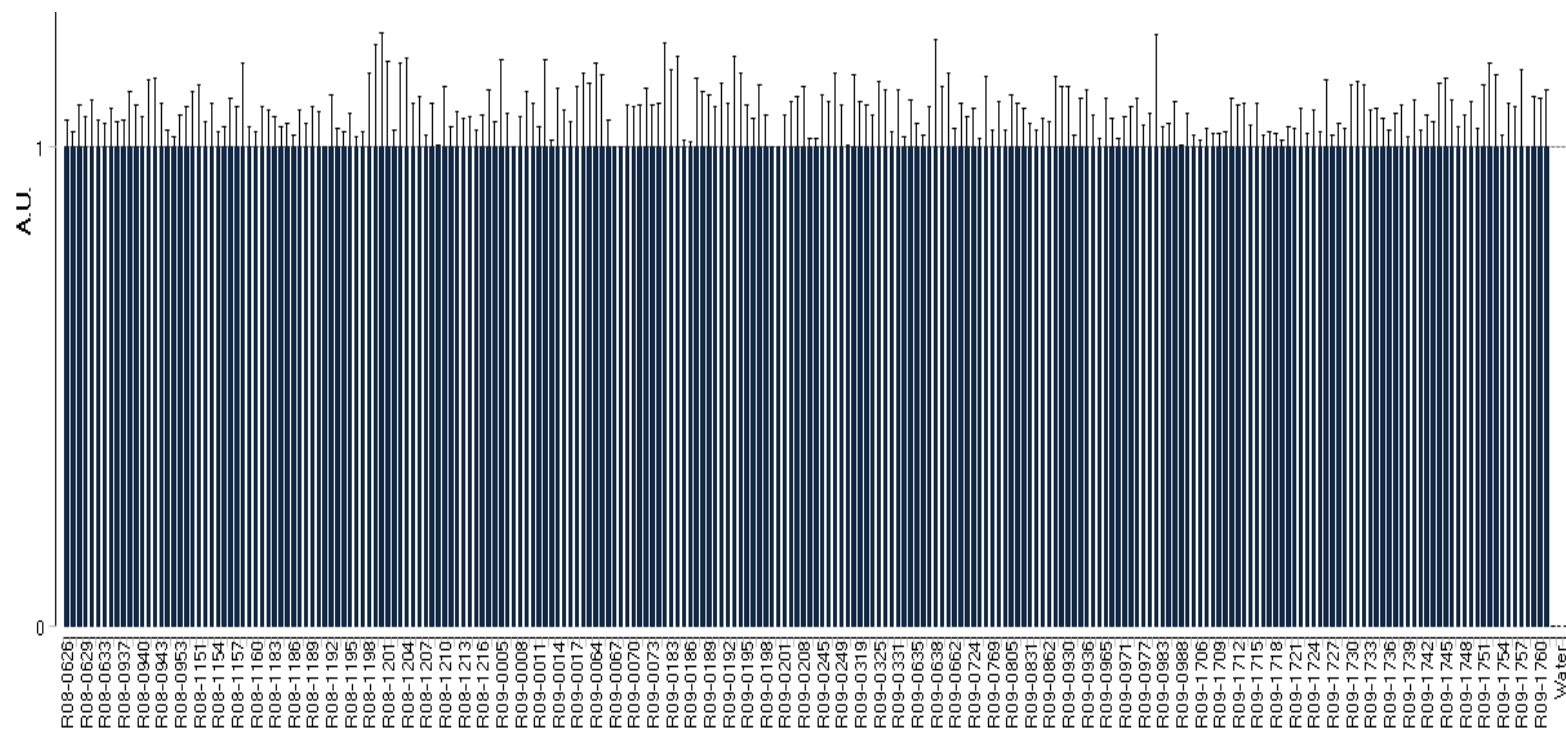

*MiR-16* expression in whole blood samples of all 226 participants. Systemic miR-16 is stably expressed across all samples and thus is a suitable reference gene for normalising RQ-PCR data in this study
